# Supplementary material for: A facile synthesis of a highly efficient β-Bi2O3/Bi2O2CO3 heterojunction with enhanced photocatalytic NO oxidation under visible light
Source: Royal Society of Chemistry journal article supplement (doi:10.1039/d0nj01325k), 2020-01-01
Supplement: d0nj01325k1.pdf [file d0nj01325k1.pdf]

## Supplementary Information

### Facile synthesis of highly efficient $\beta$ - $\text{Bi}_2\text{O}_3/\text{Bi}_2\text{O}_2\text{CO}_3$ heterojunction with enhanced photocatalytic NO oxidation under visible light

Yaru Hao<sup>\*a</sup>, Zhaoqi Deng<sup>a</sup>, Ziquan Zhao<sup>a</sup>, Xijia Song<sup>a</sup>

<sup>[a]</sup>University of Electronic Science and Technology of China, Zhongshan Institute No.1 Xueyuan Road,  
Zhongshan 528402 China

<sup>\*</sup>To whom correspondence should be addressed

Tel: +0760 88227202

E-mail: [165689908@qq.com](mailto:165689908@qq.com)

#### Experimental details

##### photocatalytic measurements:

All photocatalytic measurements of NO oxidation were performed in a continuous flow reactor. 200 mg photocatalysts were used for each experiment. The initial concentration of NO was 600 ppb and the relative humidity of the gas was 55%. The total flow rate was controlled at 1.0 L/min. For the photocatalytic activity test under visible light, a 500-W commercial Xenon arc lamp with two optical filters were used to obtain light in the 420–700 nm range, and the integrated light intensity was 30 mW/cm<sup>2</sup>.

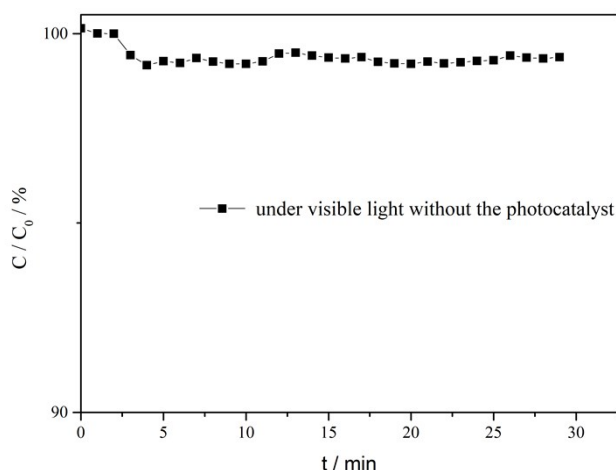

Fig. S1 Photocatalytic oxidation of NO without any photocatalyst under visible light.

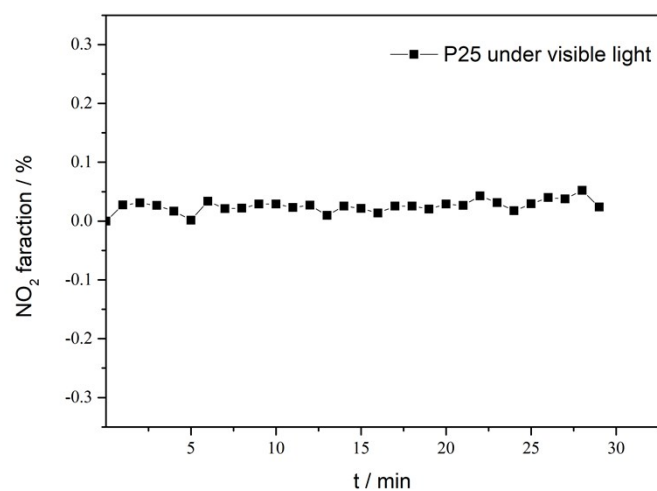

**Fig. S2** Photocatalytic activity for  $\text{NO}_2$  generation rate over P25 under visible light irradiation

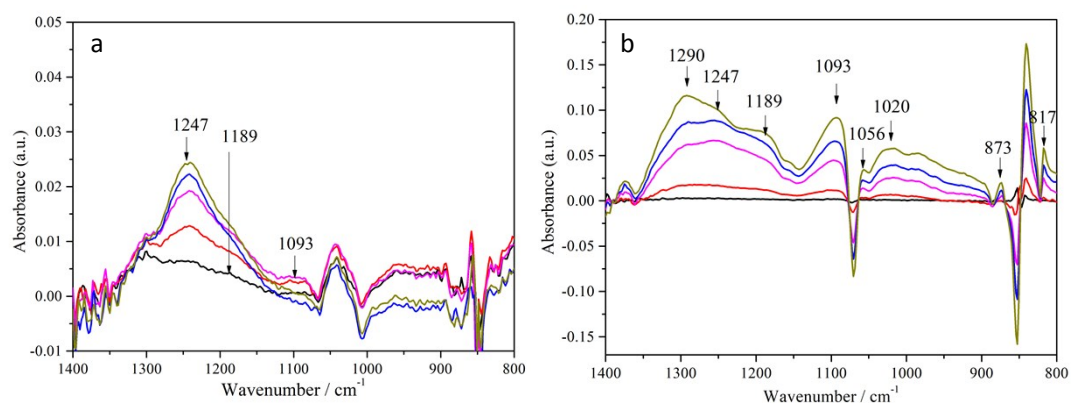

**Fig. S3** In situ FTIR spectra of the adsorption process (a) and photocatalytic degradation (b) of  $\text{NO} + \text{O}_2$  for  $\beta\text{-Bi}_2\text{O}_3/\text{Bi}_2\text{O}_2\text{CO}_3$
